# Supplementary material
Source: PubMed Central journal article supplement (PMC7271570)
Supplement: 2019_231407-Disclosures_and_Contributions.pdf [file 2019_231407-Disclosures_and_Contributions.pdf]

Haematologica  
HAEMATOL/2019/231407  
Version 3

Hydroxyurea to lower TCD velocities and prevent primary stroke: the  
Uganda NOHARM sickle cell anemia cohort

Robert O. Opoka, Heather A. Hume, Teresa S. Latham, Adam Lane,  
Olatundun Williams, Jennifer Tymon, Maria Nakafeero, Phillip Kasirye,  
Christopher M. Ndugwa, Chandy C. John, and Russell E Ware

Disclosures: None of the authors has any relevant conflict of interest to disclose.

Contributions: ROO, HAH, CCJ, and REW designed research, performed research,  
analyzed data, and wrote the paper. CMN, OW, JT, MN, and PK performed research. TSL  
and AL analyzed data.
